# Supplementary material for: Patterns, factors associated and morbidity burden of asthma in India
Source: PubMed Central journal article supplement (PMC5657621; doi:10.1371/journal.pone.0185938), 2017-10-26
Supplement: pone.0185938.s001.pdf [file pone.0185938.s001.pdf]

| Attributes                | Percentage distribution of population |             |
|---------------------------|---------------------------------------|-------------|
|                           | IHDS-2 (2011-12)                      | Census 2011 |
| <b>Place of residence</b> |                                       |             |
| Rural                     | 66.0                                  | 69.0        |
| Urban                     | 34.0                                  | 31.0        |
| <b>Sex</b>                |                                       |             |
| Male                      | 50.0                                  | 51.5        |
| Female                    | 50.0                                  | 48.5        |
| <b>Age</b>                |                                       |             |
| Less than 5 years         | 8.3                                   | 7.4         |
| 6-14 years                | 19.7                                  | 21.5        |
| 15-29 years               | 18.9                                  | 27.6        |
| 30-44 years               | 27.9                                  | 20.4        |
| 45-65 years               | 18.0                                  | 16.7        |
| 65+ years                 | 7.2                                   | 4.4         |
| <b>Literacy rate</b>      | 68.5                                  | 74.0        |
| <b>Marital Status</b>     |                                       |             |
| Never Married             | 45.2                                  | 47.1        |
| Married                   | 48.3                                  | 47.9        |
| Others                    | 6.5                                   | 5.0         |
| <b>Religion</b>           |                                       |             |
| Hindu                     | 80.1                                  | 79.8        |
| Muslim                    | 13.6                                  | 14.2        |
| Others                    | 6.3                                   | 6.0         |
