# Supplementary material for: Patterns, factors associated and morbidity burden of asthma in India
Source: PubMed Central journal article supplement (PMC5657621; doi:10.1371/journal.pone.0185938), 2017-10-26
Supplement: pone.0185938.s002.pdf [file pone.0185938.s002.pdf]

| Regions                           | Prevalence rate (per 1000) |               | %age distribution (N=215,754) |           |            |
|-----------------------------------|----------------------------|---------------|-------------------------------|-----------|------------|
|                                   | Reported (N)               | Diagnosed (N) | Reported                      | Diagnosed | Population |
| <b>India</b>                      | 41.9 (9,049)               | 5.5 (1,197)   | -                             | -         | -          |
| Rural                             | 45.2 (6,484)               | 5.9 (853)     | 71.6                          | 71.3      | 66.4       |
| Urban                             | 35.4 (2,565)               | 4.8 (344)     | 28.4                          | 28.7      | 33.6       |
| Poorer States <sup>a</sup>        | 53.3 (4,463)               | 5.7 (480)     | 49.3                          | 40.1      | 39.3       |
| Richer States <sup>b</sup>        | 35.0 (4,586)               | 5.5 (717)     | 50.7                          | 59.9      | 60.7       |
| Northern states <sup>c</sup>      | 53.3 (3,134)               | 4.6 (271)     | 34.6                          | 22.6      | 27.3       |
| Southern states <sup>d</sup>      | 23.7 (1,126)               | 6.7 (319)     | 12.4                          | 26.7      | 22.0       |
| Eastern states <sup>e</sup>       | 64.7 (2,288)               | 7.3 (257)     | 25.3                          | 21.5      | 16.4       |
| Western states <sup>f</sup>       | 29.3 (1,249)               | 5.9 (253)     | 13.8                          | 21.1      | 19.8       |
| Central states <sup>g</sup>       | 45.4 (1,000)               | 4.3 (94)      | 11.1                          | 7.9       | 10.2       |
| North-Eastern states <sup>h</sup> | 26.7 (252)                 | 1.0 (03)      | 2.8                           | 0.3       | 4.4        |

\* reported case includes both diagnosed cases as well as cases having short breadth;

\*\*Diagnosed cases includes only those cases who were ever diagnosed with asthma by doctor;

**a** Poorer states include 9 EAGA states namely: Bihar, Jharkhand, Chhattisgarh, Madhya Pradesh, Uttar Pradesh, Uttarakhand, Orissa, Rajasthan, Assam;

**b** Richer states include Non-EAGA states namely: Jammu and Kashmir, Himachal Pradesh, Punjab, Andhra Pradesh, Karnataka, Kerala, Tamil Nadu, West Bengal, Gujarat, Goa, Maharashtra, Madhya Pradesh, Sikkim, Nagaland, Meghalaya, Tripura, Mizoram, Arunachal Pradesh, Manipur;

**c** Northern states includes states namely: Jammu and Kashmir, Himachal Pradesh, Punjab, Uttar Pradesh, Uttarakhand;

**d** Southern states includes states namely: Andhra Pradesh, Karnataka, Kerala, Tamil Nadu, Pondicherry;

**e** Eastern states includes states namely: Bihar, West Bengal, Orissa, Jharkhand;

**f** Western states includes states namely: Rajasthan, Gujarat, Goa, Maharashtra, Daman and Diu, Dadar and Nagar Haveli;

**g** Central states includes states namely: Madhya Pradesh, Chhattisgarh;

**h** North-Eastern states includes states namely: Assam, Sikkim, Nagaland, Meghalaya, Tripura, Mizoram, Arunachal Pradesh.
