# Supplementary material for: Patterns, factors associated and morbidity burden of asthma in India
Source: PubMed Central journal article supplement (PMC5657621; doi:10.1371/journal.pone.0185938), 2017-10-26
Supplement: pone.0185938.s003.pdf [file pone.0185938.s003.pdf]

| <b>Covariate</b>                 | <b>Prevalence per (1000)</b> | <b>Crude OR (95% CI)</b> |
|----------------------------------|------------------------------|--------------------------|
| <b>Type of house<sup>@</sup></b> |                              |                          |
| <i>Kachha</i> House              | 74.4 (323)                   | 1.00                     |
| <i>Semi-Pakka</i> House          | 56.7 (6,944)                 | 0.68 (0.58-0.80)*        |
| <i>Pakka</i> House               | 50.9 (3,962)                 | 0.58 (0.49-0.69)*        |
| <b>Electricity in house</b>      |                              |                          |
| No                               | 86.8 (2,167)                 | 1.00                     |
| Yes                              | 50.6 (9,057)                 | 0.52 (0.52-0.56)*        |
| <b>Motor vehicle</b>             |                              |                          |
| No                               | 61.4 (8,386)                 | 1.00                     |
| Yes                              | 41.9 (2,837)                 | 0.62 (0.59-0.66)*        |
| <b>Cooking place</b>             |                              |                          |
| In living area                   | 67.4 (3,104)                 | 1.00                     |
| Outdoors                         | 64.3 (2,416)                 | 1.50 (1.40-1.61)*        |
| Separate Kitchen                 | 47.4 (5,702)                 | 1.46 (1.36-1.57)*        |
| <b>Stove type</b>                |                              |                          |
| Others/Not Biomass               | 41.9 (3,003)                 | 1.00                     |
| Open fire                        | 65.3 (2,173)                 | 1.83 (1.67-2.01)*        |
| Traditional stove                | 64.3 (5,384)                 | 1.73 (1.64-1.84)*        |
| Improved stove                   | 43.6 (640)                   | 1.35 (1.19-1.53)*        |
| <b>Firewood as fuel</b>          |                              |                          |
| No                               | 413 (2,255)                  | 1.00                     |
| Yes                              | 69.8 (8,974)                 | 1.78 (1.68-1.90)*        |
| <b>Cow dung cake as fuel</b>     |                              |                          |
| No                               | 45.6 (5,454)                 | 1.00                     |
| Yes                              | 67.9 (5,775)                 | 1.89 (1.77-2.02)*        |
| <b>Crop residual as fuel</b>     |                              |                          |
| No                               | 51.2 (8,021)                 | 1.00                     |
| Yes                              | 67.9 (3,208)                 | 1.94 (1.83-2.06)*        |
| <b>Kerosene as fuel</b>          |                              |                          |
| No                               | 45.8 (2,514)                 | 1.00                     |
| Yes                              | 58.2 (8,715)                 | 1.69 (1.59-1.82)*        |
| <b>Coal as fuel</b>              |                              |                          |
| No                               | 55.2 (10,864)                | 1.00                     |
| YEs                              | 46.1 (365)                   | 1.15 (0.98-1.36)**       |
| <b>LPG as fuel</b>               |                              |                          |
| No                               | 63.6 (6,911)                 | 1.00                     |
| Yes                              | 45.0 (4,318)                 | 0.62 (0.59-0.66)*        |
| <b>Source of water</b>           |                              |                          |
| Piped water                      | 44.1 (4,209)                 | 1.00                     |
| Tube well                        | 49.1 (1,126)                 | 1.40 (1.23-1.59)*        |
| Hand pump                        | 77.8 (4,446)                 | 1.93 (1.28-2.05)*        |
| Open well                        | 51.0 (860)                   | 1.13 (1.03-1.25)*        |
| Others                           | 48.7 (588)                   | 1.13 (1.01-1.28)*        |

\*significant at  $p < 0.05$ ; \*\*not significant at  $p < 0.05$  but significant at  $p < 0.01$ ; <sup>@</sup>is computed using three variables: type of floor, type of roof, and type of wall
