# Supplementary material for: Patterns, factors associated and morbidity burden of asthma in India
Source: PubMed Central journal article supplement (PMC5657621; doi:10.1371/journal.pone.0185938), 2017-10-26
Supplement: pone.0185938.s004.pdf [file pone.0185938.s004.pdf]

| Covariates                           | Rural                   |                      | Urban                   |                      |
|--------------------------------------|-------------------------|----------------------|-------------------------|----------------------|
|                                      | Prevalence per 1000 (N) | Adjusted OR (95% CI) | Prevalence per 1000 (N) | Adjusted OR (95% CI) |
| <b>Sex</b>                           |                         |                      |                         |                      |
| Male                                 | 57.1 (3,834)            | 1.00                 | 42.3 (1,478)            | 1.00                 |
| Female                               | 62.4 (4,236)            | 1.01 (0.91-1.12)     | 48.6 (1,681)            | 1.17 (1.05-1.30)*    |
| <b>Age-group</b>                     |                         |                      |                         |                      |
| Less than 5 years                    | 135.7 (1,653)           | 1.00                 | 117.3 (568)             | 1.00                 |
| 5-14 years                           | 52.5 (1,476)            | 0.31 (0.27-0.36)*    | 48.9 (597)              | 0.45 (0.37-0.55)*    |
| 15-29 years                          | 29.2 (1,045)            | 0.28 (0.23-0.35)*    | 26.0 (506)              | 0.38 (0.31-0.49)*    |
| 30-44 years                          | 42.0 (1,076)            | 0.39 (0.30-0.51)*    | 28.4 (423)              | 0.43 (0.32-0.59)*    |
| 45-69 years                          | 75.8 (2,063)            | 0.64 (0.49-0.83)*    | 54.2 (828)              | 0.71 (0.53-0.96)*    |
| 69+ years                            | 122.2 (757)             | 1.17 (0.83-1.64)     | 84.7 (237)              | 1.20 (0.84-1.72)     |
| <b>Marital status</b>                |                         |                      |                         |                      |
| Married                              | 53.6 (3,499)            | 1.00                 | 38.7 (1,298)            | 1.00                 |
| Unmarried                            | 61.4 (3,750)            | 1.04 (0.84-1.30)     | 49.4 (1,549)            | 1.12 (0.90-1.41)     |
| Others <sup>#</sup>                  | 95.1 (820)              | 1.19 (0.99-1.43)***  | 68.2 (312)              | 1.02 (0.83-1.26)     |
| <b>Year of schooling</b>             |                         |                      |                         |                      |
| 11 years and above                   | 27.4 (391)              | 1.00                 | 27.1 (458)              | 1.00                 |
| 6-10 years                           | 36.9 (1,445)            | 1.05 (0.86-1.29)     | 33.6 (219)              | 1.16 (0.99-1.37)***  |
| 1-5 years                            | 54.6 (1,658)            | 1.13 (0.91-1.39)     | 47.8 (623)              | 1.40 (1.17-1.68)*    |
| 0 years <sup>+</sup>                 | 90.4 (4,250)            | 1.23 (1.01-1.51)**   | 79.4 (1,075)            | 1.85 (1.50-2.23)*    |
| <b>Smoke<sup>++</sup></b>            |                         |                      |                         |                      |
| No                                   | 58.6 (7,226)            | 1.00                 | 44.9 (2,940)            | 1.00                 |
| Yes                                  | 72.5 (844)              | 1.29 (1.11-1.52)*    | 54.9 (219)              | 1.45 (1.13-1.87)*    |
| <b>Chew tobacco<sup>+++</sup></b>    |                         |                      |                         |                      |
| No                                   | 58.4 (6,938)            | 1.00                 | 45.6 (2,913)            | 1.00                 |
| Yes                                  | 69.7 (1,132)            | 1.07 (0.94-1.23)     | 43.7 (246)              | 0.92 (0.74-1.12)     |
| <b>Drink Alcohol<sup>+++</sup></b>   |                         |                      |                         |                      |
| No                                   | 60.1 (7,600)            | 1.00                 | 45.6 (3,017)            | 1.00                 |
| Yes                                  | 54.5 (470)              | 0.73 (0.60-0.87)*    | 42.0 (142)              | 0.77 (0.55-1.05)     |
| <b>Vegetarian</b>                    |                         |                      |                         |                      |
| Yes                                  | 59.8 (2,390)            | 1.00                 | 43.5 (699)              | 1.00                 |
| No                                   | 60.0 (5,675)            | 0.83 (0.75-0.92)*    | 46.2 (2,458)            | 0.94 (0.83-1.06)     |
| <b>Body Mass Index</b>               |                         |                      |                         |                      |
| Normal Weight                        | 56.4 (2,141)            | 1.00                 | 42.9 (793)              | 1.00                 |
| Underweight                          | 80.5 (3,554)            | 1.32 (1.19-1.46)*    | 67.7 (1,044)            | 1.25 (1.09-1.43)*    |
| Overweight                           | 60.6 (454)              | 1.19 (1.01-1.43)**   | 42.3 (317)              | 0.98 (0.85-1.14)     |
| Obese                                | 76.7 (201)              | 1.14 (0.89-1.43)     | 58.3 (172)              | 1.17 (0.96-1.42)     |
| <b>Wealth Quintile</b>               |                         |                      |                         |                      |
| Middle                               | 51.8 (1,762)            | 1.00                 | 54.9 (541)              | 1.00                 |
| Poorest                              | 86.0 (2,369)            | 1.67 (1.48-1.88)*    | 59.8 (72)               | 0.94 (0.68-1.29)     |
| Poor                                 | 65.5 (2,198)            | 1.24 (1.10-1.40)*    | 64.3 (272)              | 1.15 (0.96-1.40)     |
| Rich                                 | 46.7 (1,138)            | 0.94 (0.82-1.09)     | 45.2 (942)              | 0.94 (0.82-1.09)     |
| Richest                              | 38.7 (598)              | 0.75 (0.62-0.91)*    | 39.9 (1,330)            | 0.88 (0.75-1.04)     |
| <b>Type of fuel use<sup>\$</sup></b> |                         |                      |                         |                      |
| Clean only                           | 33.4 (204)              | 1.00                 | 39.6 (21,522)           | 1.00                 |
| Others                               | 61.0 (5,264)            | 1.23 (0.96-1.57)     | 52.6 (1,637)            | 1.25 (1.11-1.41)*    |
| <b>Hours burning stove</b>           |                         |                      |                         |                      |

|                            |              |                   |              |                    |
|----------------------------|--------------|-------------------|--------------|--------------------|
| Less than 3 hours          | 57.7 (2,756) | --                | 45.3 (2,182) | --                 |
| 3 hours and more           | 61.1 (5,264) | --                | 45.8 (950)   | --                 |
| <b>Hours burning stove</b> | --           | 1.05 (1.02-1.08)* | --           | 1.01 (0.96-1.03)   |
| <b>Religion</b>            |              |                   |              |                    |
| Hindu                      | 58.7 (6,539) | 1.00              | 43.5 (2,276) | 1.00               |
| Muslim                     | 71.8 (1,075) | 1.31 (1.15-1.48)* | 53.6 (686)   | 1.14 (1.01-1.31)** |
| Others <sup>&amp;</sup>    | 52.8 (456)   | 1.38 (1.08-1.76)* | 46.2 (197)   | 1.32 (1.09-1.61)*  |
| <b>Caste<sup>^</sup></b>   |              |                   |              |                    |
| General                    | 59.0 (2,046) | 1.00              | 45.4 (1,133) | 1.00               |
| Other Backward Class       | 61.1 (3,357) | 0.98 (0.88-1.11)  | 46.5 (1,349) | 0.89 (0.80-0.99)** |
| Scheduled Castes           | 65.5 (1,989) | 1.01 (0.87-1.19)  | 47.7 (610)   | 0.94 (0.81-1.08)   |
| Scheduled Tribes           | 45.1 (673)   | 0.65 (0.55-0.78)* | 25.1 (62)    | 0.51 (0.36-0.71)*  |
| <b>Total</b>               | 59.8 (8,070) | --                | 45.4 (3,159) | --                 |

\*significant at  $p < 0.05$ ; \*\*not significant at  $p < 0.05$  but significant at  $p < 0.1$ ; <sup>#</sup>Includes widow, separated and divorced; <sup>‡</sup>0 years of schooling also includes those who never attended school; <sup>++</sup>includes cigarette and *bidli* both and presently smoking or ever smoked were categorised as yes and never as no; <sup>+++</sup>presently using and ever used categorised as yes and never as no; <sup>&</sup>includes Sikh, Christian, Jain, Buddhism and others; <sup>^</sup>Caste system is a sort of social class system in which people are classified based on culture and occupation [13], <sup>§</sup>Clean only includes LPG and Others includes firewood, crop residual, cow dung cake, coal and kerosene which were used for any purpose
