# Supplementary material for: Patterns, factors associated and morbidity burden of asthma in India
Source: PubMed Central journal article supplement (PMC5657621; doi:10.1371/journal.pone.0185938), 2017-10-26
Supplement: pone.0185938.s005.pdf [file pone.0185938.s005.pdf]

| Covariates                           | Male                    |                      | Female                  |                      |
|--------------------------------------|-------------------------|----------------------|-------------------------|----------------------|
|                                      | Prevalence per 1000 (N) | Adjusted OR (95% CI) | Prevalence per 1000 (N) | Adjusted OR (95% CI) |
| <b>Age-group</b>                     |                         |                      |                         |                      |
| Less than 5 years                    | 138.1 (1,251)           | 1.00                 | 122.3 (1,006)           | 1.00                 |
| 5-14 years                           | 54.9 (1,158)            | 0.35 (0.29-0.43)*    | 47.6 (915)              | 0.32 (0.27-0.38)*    |
| 15-29 years                          | 24.2 (660)              | 0.28 (0.23-0.37)*    | 31.8 (891)              | 0.31 (0.24-0.39)*    |
| 30-44 years                          | 24.4 (480)              | 0.38 (0.26-0.56)*    | 49.0 (1,019)            | 0.43 (0.33-0.56)*    |
| 45-69 years                          | 60.7 (1,272)            | 0.78 (0.56-1.07)     | 75.2 (1,619)            | 0.66 (0.50-0.86)*    |
| 79+ years                            | 123.7 (527)             | 1.74 (1.20-2.52)*    | 98.6 (467)              | 0.86 (0.54-1.37)     |
| <b>Marital status</b>                |                         |                      |                         |                      |
| Married                              | 44.2 (2,124)            | 1.00                 | 52.5 (2,673)            | 1.00                 |
| Unmarried                            | 57.1 (2,939)            | 1.42 (1.09-1.84)*    | 57.5 (2,360)            | 1.06 (0.83-1.34)     |
| Others <sup>#</sup>                  | 94.9 (248)              | 1.38 (0.98-1.92)***  | 83.5 (884)              | 1.12 (0.93-1.34)     |
| <b>Year of schooling</b>             |                         |                      |                         |                      |
| 11 years and above                   | 25.1 (461)              | 1.00                 | 30.4 (388)              | 1.00                 |
| 6-10 years                           | 32.8 (1,145)            | 0.98 (0.80-1.21)     | 39.2 (1,090)            | 1.68 (0.96-1.41)     |
| 1-5 years                            | 54.2 (1,210)            | 1.18 (0.94-1.48)     | 50.8 (1,071)            | 1.82 (0.97-1.44)***  |
| 0 years <sup>+</sup>                 | 95.5 (2,188)            | 1.41 (1.09-1.80)*    | 83.3 (3,137)            | 1.26 (1.03-1.53)**   |
| <b>Smoke<sup>++</sup></b>            |                         |                      |                         |                      |
| No                                   | 50.1 (4,372)            | 1.00                 | 57.0 (5,794)            | 1.00                 |
| Yes                                  | 63.8 (940)              | 1.35 (1.14-1.60)*    | 135.8 (123)             | 1.85 (1.34-2.57)*    |
| <b>Chew tobacco<sup>+++</sup></b>    |                         |                      |                         |                      |
| No                                   | 51.4 (4,367)            | 1.00                 | 56.1 (5,484)            | 1.00                 |
| Yes                                  | 55.3 (945)              | 1.12 (0.95-1.32)     | 90.5 (433)              | 1.15 (0.96-1.37)     |
| <b>Drink Alcohol<sup>+++</sup></b>   |                         |                      |                         |                      |
| No                                   | 52.3 (4,735)            | 1.00                 | 57.7 (5,882)            | 1.00                 |
| Yes                                  | 50.1 (577)              | 0.81 (0.67-0.97)**   | 72.5 (35)               | 0.74 (0.43-1.26)     |
| <b>Vegetarian</b>                    |                         |                      |                         |                      |
| No                                   | 51.3 (1,440)            | 1.00                 | 58.9 (1,649)            | 1.00                 |
| Yes                                  | 52.5 (3,869)            | 0.88 (0.77-1.01)***  | 57.5 (4,264)            | 0.82 (0.73-0.92)*    |
| <b>Body Mass Index</b>               |                         |                      |                         |                      |
| Normal Weight                        | 48.7 (1,129)            | 1.00                 | 54.3 (1,805)            | 1.00                 |
| Underweight                          | 84.2 (2,409)            | 1.50 (1.31-1.72)*    | 70.6 (2,189)            | 1.16 (1.04-1.30)*    |
| Overweight                           | 38.1 (212)              | 1.17 (0.90-1.52)     | 59.3 (559)              | 1.06 (0.92-1.21)     |
| Obese                                | 60.3 (109)              | 0.95 (0.72-1.26)     | 70.2 (264)              | 1.21 (0.99-1.46)***  |
| <b>Wealth quintile</b>               |                         |                      |                         |                      |
| Middle                               | 49.6 (1,090)            | 1.00                 | 55.5 (1,213)            | 1.00                 |
| Poorer                               | 85.0 (1,195)            | 1.76 (1.49-2.07)*    | 84.8 (1,246)            | 1.49 (1.29-1.72)*    |
| Poor                                 | 63.3 (1,187)            | 1.30 (1.11-1.53)*    | 67.3 (1,283)            | 1.17 (1.02-1.34)**   |
| Rich                                 | 42.1 (950)              | 0.94 (0.80-1.13)     | 49.9 (1,130)            | 0.94 (0.82-1.08)     |
| Richer                               | 36.0 (887)              | 0.83 (0.68-1.02)***  | 43.0 (1,041)            | 0.78 (0.67-0.92)*    |
| <b>Type of fuel use<sup>\$</sup></b> |                         |                      |                         |                      |
| Clean only                           | 35.7 (800)              | 1.00                 | 41.8 (926)              | 1.00                 |
| Others                               | 56.6 (4,512)            | 1.14 (0.95-1.37)     | 62.1 (4,991)            | 1.25 (1.10-1.43)*    |
| <b>Hours burning stove</b>           |                         |                      |                         |                      |
| Less than 3 hours                    | 50.7 (3,405)            | --                   | 56.5 (3,813)            | --                   |
| 3 hours and more                     | 55.1 (1,867)            | --                   | 60.7 (2,067)            | --                   |
| <b>Hours burning stove</b>           | --                      | 1.06 (1.03-1.11)*    | --                      | 1.02 (0.98-1.05)     |
| <b>Religion</b>                      |                         |                      |                         |                      |
| Hindu                                | 51.1 (4,179)            | 1.00                 | 56.4 (4,636)            | 1.00                 |
| Muslim                               | 61.5 (850)              | 1.25 (1.07-1.46)*    | 65.2 (911)              | 1.27 (1.12-1.45)*    |
| Others <sup>&amp;</sup>              | 43.6 (283)              | 1.31 (0.95-1.81)***  | 57.8 (370)              | 1.38 (1.13-1.69)*    |
| <b>Caste<sup>^</sup></b>             |                         |                      |                         |                      |

|                           |                     |                   |                     |                   |
|---------------------------|---------------------|-------------------|---------------------|-------------------|
| General                   | 49.9 (1,491)        | 1.00              | 56.6 (1,688)        | 1.00              |
| Other Backward Class      | 53.6 (2,242)        | 0.90 (0.78-1.03)  | 58.5 (2,464)        | 1.02 (0.91-1.14)  |
| Scheduled Castes          | 56.9 (1,223)        | 0.93 (0.78-1.11)  | 63.6 (1,376)        | 1.02 (0.89-1.16)  |
| Scheduled Tribes          | 40.9 (353)          | 0.59 (0.46-0.74)* | 43.7 (382)          | 0.68 (0.56-0.83)* |
| <b>Place of residence</b> |                     |                   |                     |                   |
| Rural                     | 57.1 (3,834)        | 1.00              | 62.4 (4,236)        | 1.00              |
| Urban                     | 42.3 (1,478)        | 0.94 (0.83-1.07)  | 48.6 (1,681)        | 1.01 (0.91-1.11)  |
| <b>Total</b>              | <b>52.0 (5,312)</b> | <b>--</b>         | <b>57.7 (5,917)</b> | <b>--</b>         |

\*significant at  $p < 0.05$ ; \*\*not significant at  $p < 0.05$  but significant at  $p < 0.1$ ; #Includes widow, separated and divorced; †0 years of schooling also includes those who never attended school; ++includes cigarette and *bidhi* both and presently smoking or ever smoked were categorised as yes and never as no; +++presently using and ever used categorised as yes and never as no; ††includes Sikh, Christian, Jain, Buddhism and others; ^Caste system is a sort of social class system in which people are classified based on culture and occupation [13], †Clean only includes LPG and Others includes firewood, crop residual, cow dung cake, coal and kerosene which were used for any purpose
